# Supplementary material
Source: MDPI journal article supplement (https://www.mdpi.com/1999-4907/13/9/1379)
Supplement: s1 [file s1 › forests-1853817-supplementary.pdf]

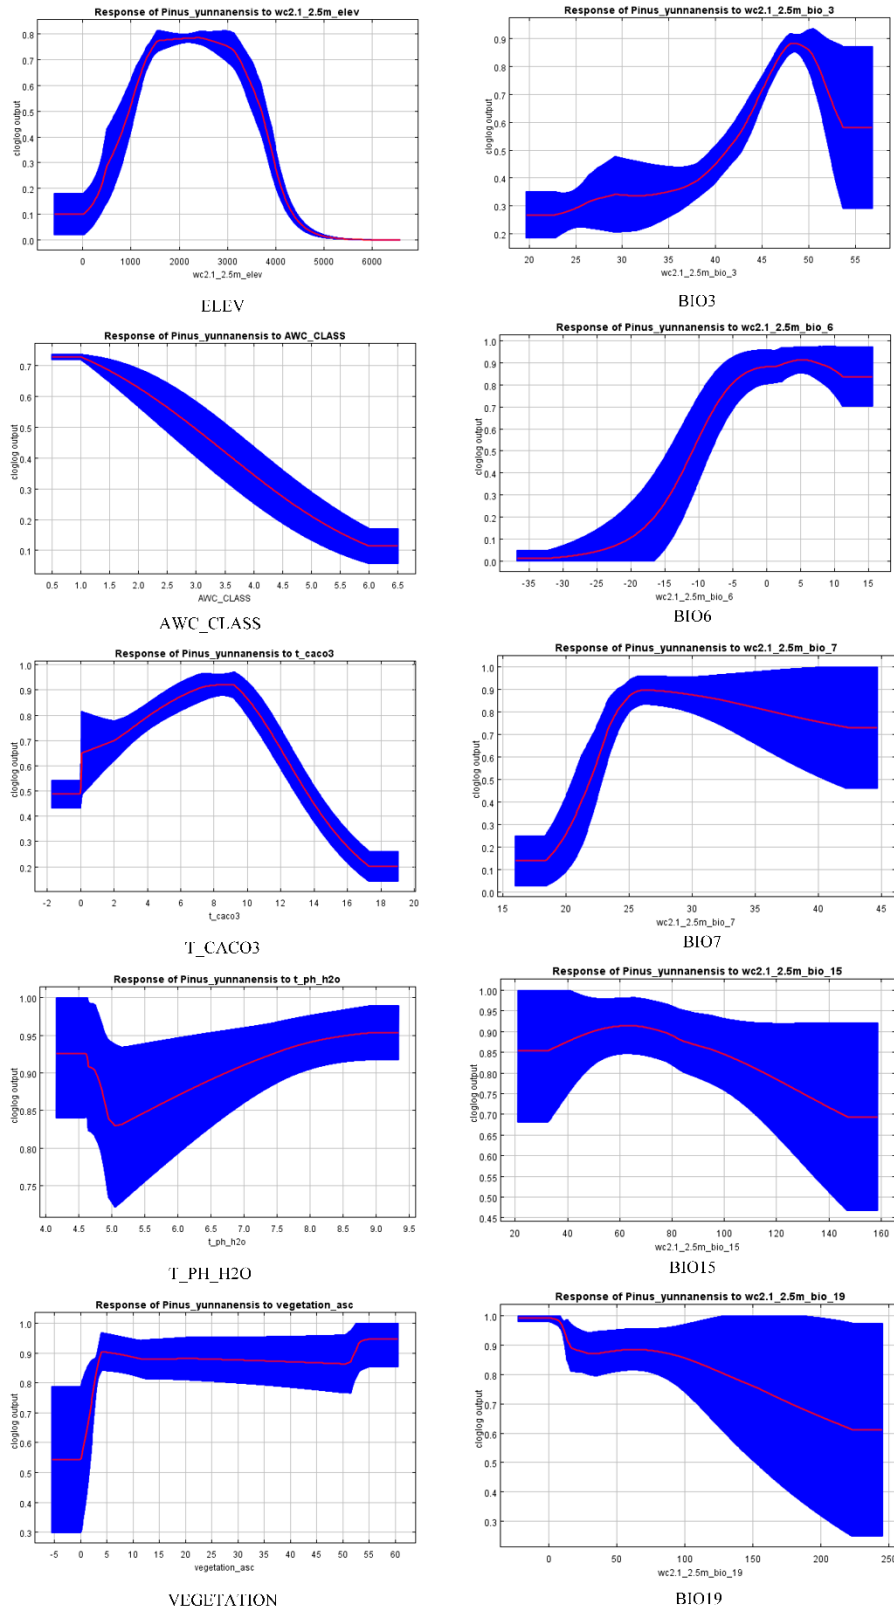

Figure S1 Response curves of 10 environmental variables in potential distribution model of *P. yunnanensis*

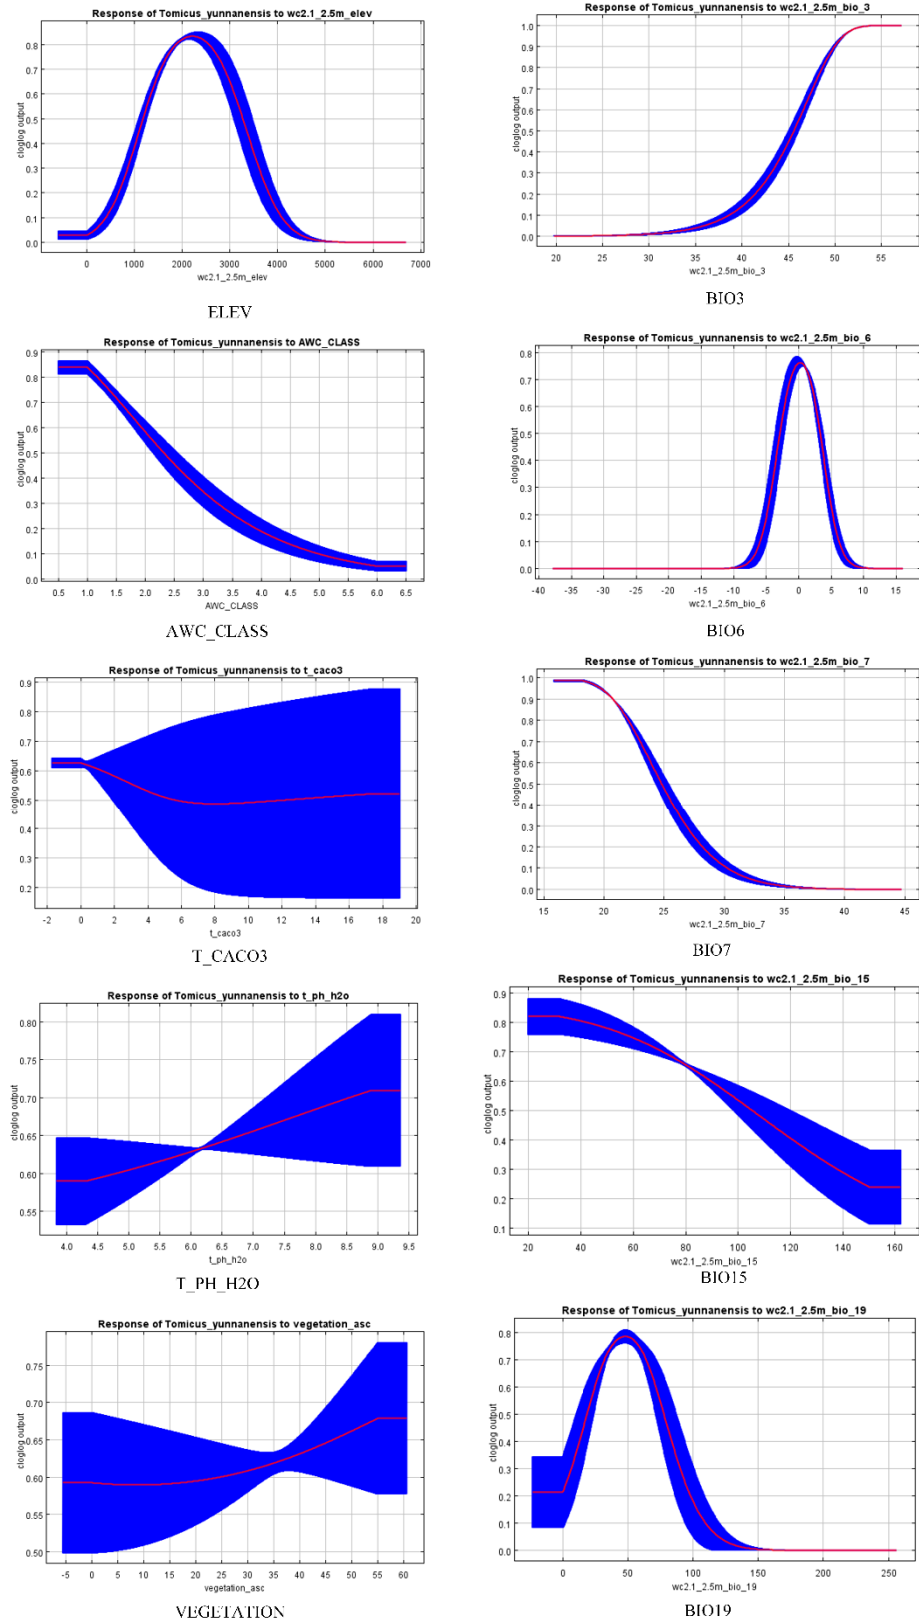

Figure S2 Response curves of 10 environmental variables in potential distribution model of *T. yunnanensis*.
